# Supplementary material for: Pumilio2 regulates synaptic plasticity via translational repression of synaptic receptors in mice
Source: PubMed Central journal article supplement (PMC6114944; doi:10.18632/oncotarget.24345), 2018-01-30
Supplement: oncotarget-09-32134-s001.pdf [file oncotarget-09-32134-s001.pdf]

## *Pumilio2* regulates synaptic plasticity via translational repression of synaptic receptors in mice

### SUPPLEMENTARY MATERIALS

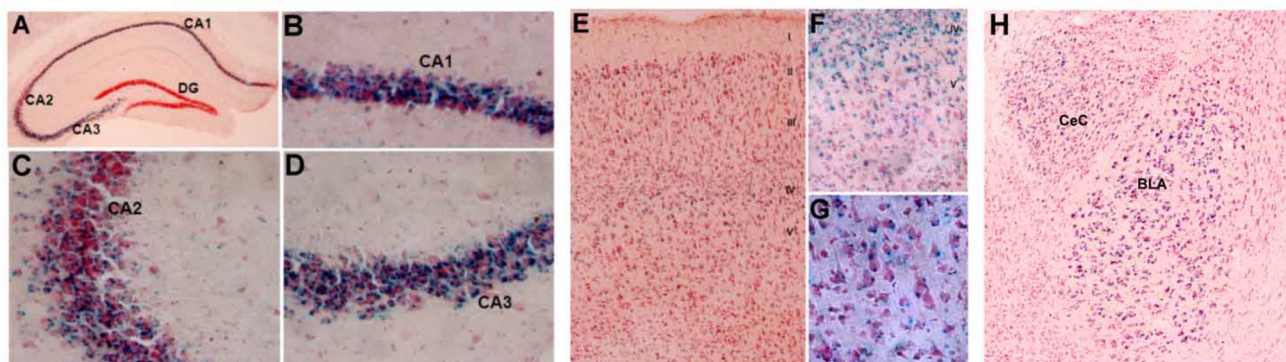

Supplementary Figure 1: Coronal sections of mouse brain from heterozygote *Pum2* gene trap mice *Pum2*<sup>NE772</sup> was stained with X-gal. LacZ Positive cells staining blue color, indicative of *Pum2* mRNA expression, were seen in many brain regions of the mice, including the hippocampus (A–D), frontal cortex (E–G) and the amygdala (H). Nuclei stained red in the images).

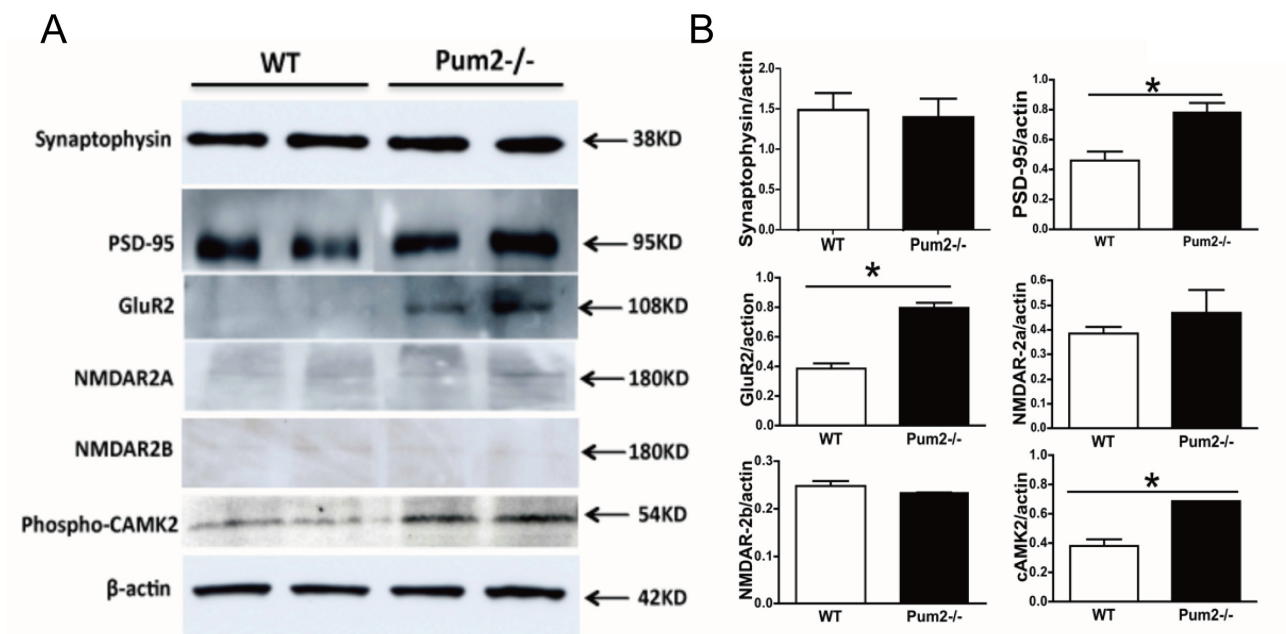

Supplementary Figure 2: Western blot analysis of synaptic related protein expression in the hippocampus in the absence of *Pum2*. (A) PSD95, GLUR2, and phospho-CAMK2 were significantly increased in *Pum2*<sup>-/-</sup> mice. (B) Western blot signal intensity was quantified showing significant increases in *Pum2*<sup>-/-</sup> mutant tissues for PSD-95, GLUR2, and CAMK2. \*means  $p < 0.05$ . Data represent as mean  $\pm$  SEM.
